# Supplementary material for: Longitudinal Trend of Health-Related Quality of Life During Concurrent Chemoradiotherapy and Survival in Patients With Stage II–IVb Nasopharyngeal Carcinoma
Source: PubMed Central journal article supplement (PMC7578369; doi:10.3389/fonc.2020.579292), 2020-10-08
Supplement: Table_1.pdf [file Table_1.pdf]

Supplementary Table 1. Differences of social-demographic and clinical characteristics between patients with and without HRQOL questionnaire at week 2.

|                                | Patients with HRQOL questionnaire at week 2 |       |          |       | <i>p</i> values |
|--------------------------------|---------------------------------------------|-------|----------|-------|-----------------|
|                                | No                                          |       | Yes      |       |                 |
|                                | <i>n</i>                                    | %     | <i>n</i> | %     |                 |
| Age at randomization, years    |                                             |       |          |       |                 |
| ≤45                            | 53                                          | 66.3  | 27       | 33.8  | 0.990           |
| >45                            | 43                                          | 66.1  | 22       | 33.9  |                 |
| Sex                            |                                             |       |          |       |                 |
| Men                            | 75                                          | 69.4  | 33       | 30.6  | 0.159           |
| Women                          | 21                                          | 56.8  | 16       | 43.2  |                 |
| Smoking habit                  |                                             |       |          |       |                 |
| No                             | 56                                          | 60.9  | 36       | 39.1  | 0.073           |
| Yes                            | 40                                          | 75.7  | 13       | 24.5  |                 |
| Drinking habit                 |                                             |       |          |       |                 |
| No                             | 68                                          | 62.4  | 41       | 37.6  | 0.091           |
| Yes                            | 28                                          | 77.8  | 8        | 22.2  |                 |
| BMI, kg/m <sup>2</sup>         |                                             |       |          |       |                 |
| <18.5                          | 4                                           | 66.7  | 2        | 33.3  | 0.246           |
| 18.5–24.9                      | 66                                          | 63.5  | 38       | 36.5  |                 |
| 25.0–29.9                      | 26                                          | 76.5  | 8        | 23.5  |                 |
| ≥30                            | 0                                           | 0     | 1        | 100.0 |                 |
| Weight loss during CCRT period |                                             |       |          |       |                 |
| No change or increase          | 19                                          | 76.0  | 6        | 24    | 0.533           |
| <5%                            | 26                                          | 70.3  | 11       | 29.7  |                 |
| 5–10%                          | 25                                          | 61    | 16       | 39.2  |                 |
| >10%                           | 26                                          | 61.9  | 16       | 38.1  |                 |
| T category                     |                                             |       |          |       |                 |
| T1                             | 1                                           | 100.0 | 0        | 0     | 0.500           |
| T2                             | 15                                          | 55.6  | 12       | 44.4  |                 |
| T3                             | 60                                          | 66.7  | 30       | 33.3  |                 |
| T4                             | 20                                          | 74.1  | 7        | 25.9  |                 |
| N stage                        |                                             |       |          |       |                 |
| N0                             | 12                                          | 85.7  | 2        | 14.3  | 0.094           |
| N1                             | 40                                          | 71.4  | 16       | 28.6  |                 |
| N2                             | 37                                          | 56.1  | 29       | 43.9  |                 |
| N3                             | 7                                           | 77.8  | 2        | 22.2  |                 |
| AJCC stage                     |                                             |       |          |       |                 |
| II                             | 11                                          | 73.3  | 4        | 26.7  | 0.354           |
| III                            | 59                                          | 62.1  | 36       | 37.9  |                 |
| IV                             | 26                                          | 74.3  | 9        | 25.7  |                 |
| Epstein-Barr virus DNA test    |                                             |       |          |       |                 |
| DNA <1500 copies per mL        | 53                                          | 67.1  | 26       | 32.9  | 0.806           |
| DNA ≥1500 copies per mL        | 43                                          | 65.2  | 23       | 34.8  |                 |

|                          |    |      |    |      |        |
|--------------------------|----|------|----|------|--------|
| Intervention             |    |      |    |      |        |
| Cisplatin                | 46 | 61.3 | 29 | 38.7 | 0.199  |
| Nedaplatin               | 50 | 71.4 | 20 | 28.6 |        |
| Chemotherapy cycles      |    |      |    |      |        |
| Two or less cycles       | 14 | 35.9 | 25 | 64.1 | <0.001 |
| Three cycles             | 82 | 77.4 | 24 | 22.6 |        |
| Duration of radiotherapy |    |      |    |      |        |
| ≤42 days                 | 32 | 58.2 | 23 | 41.8 | 0.110  |
| >42 days                 | 64 | 71.1 | 26 | 28.9 |        |
| Disease progression      |    |      |    |      |        |
| Yes                      | 19 | 90.5 | 2  | 9.5  | 0.011  |
| No                       | 77 | 62.1 | 47 | 37.9 |        |
| Death                    |    |      |    |      |        |
| Yes                      | 8  | 100  | 0  | 0    | 0.033  |
| No                       | 88 | 64.2 | 49 | 35.8 |        |
| Distant metastasis       |    |      |    |      |        |
| Yes                      | 13 | 92.9 | 1  | 7.1  | 0.035  |
| No                       | 83 | 63.4 | 48 | 36.6 |        |

---

HRQOL: Health-related quality of life; BMI: Body weight index; CCRT: Concurrent chemoradiotherapy; AJCC: American joint committee on cancer.

*p* values were obtained by  $\chi^2$  test or Fisher exact test.
